# Supplementary material for: Antihypertensive Peptides from Ultrafiltration and Fermentation of the Ricotta Cheese Exhausted Whey: Design and Characterization of a Functional Ricotta Cheese
Source: MDPI journal article supplement (doi:10.3390/foods10112573), 2021-10-25
Supplement: s1 [file s1]

**Table S1.** List of microorganisms used in this study. The source of isolation and corresponding references are also reported.

| Strain                                                         | Medium | Temperature (°C) | Source of isolation                    | Reference |
|----------------------------------------------------------------|--------|------------------|----------------------------------------|-----------|
| <i>Lacticaseibacillus casei</i> FC13                           | MRS    | 37               | “Flor di capra”<br>(sheep milk cheese) | [19]      |
| <i>Lactobacillus helveticus</i> PR4                            |        |                  | Parmigiano                             | [57]      |
|                                                                |        | Reggiano cheese  | [21]                                   |           |
| <i>Lactobacillus delbrueckii</i> subsp. <i>bulgaricus</i> B15Z |        | 30               | Caciocavallo<br>Pugliese cheese        | [20]      |
| <i>Lactococcus lactis</i> DIBCA-2                              |        |                  | Pecorino Umbro<br>(sheep milk cheese)  | [19]      |
| <i>Streptococcus thermophilus</i> CR12                         | M17    | 37               | Fermented milk                         | [22]      |

**Table S2.** List and definition of the attributes used for the sensory analysis carried out on ricotta cheese samples.

| Attributes        | Definition                                                  | Physical reference                          |
|-------------------|-------------------------------------------------------------|---------------------------------------------|
| Color intensity   | Color of the ricotta samples                                |                                             |
| Color homogeneity | Uniformity of the ricotta texture at visual inspection      |                                             |
| <i>Odour</i>      |                                                             |                                             |
| Milk              | Typical milk odor                                           | Fresh milk                                  |
| Acidic            | Acid, sour, vinegar                                         | Milk acidified with lactic and acetic acids |
| <i>Flavor</i>     |                                                             |                                             |
| Sapidity          | Sapidity taste                                              | Ripened cheese                              |
| Bitterness        | Bitter taste                                                | Coffee                                      |
| Acidity           | Acid, sour, vinegar                                         | Milk acidified with lactic and acetic acids |
| Sweetness         | Sweet taste                                                 | Ricotta cheese added with sugar             |
| Milk              | Typical milk flavour                                        | Fresh milk                                  |
| Butter            | Typical butter flavour                                      | Butter                                      |
| Off-flavors       | Presence of off-flavours                                    |                                             |
| Persitency        | After-taste persistency of the flavor                       |                                             |
| Intensity         | After-taste intensity of the flavor                         |                                             |
| <i>Texture</i>    |                                                             |                                             |
| Adesivnhess       | Adherence to the spoon                                      |                                             |
| Graininess        | Perception of grains (lumps) and heterogeneity in the mouth |                                             |
| Friability        | Tendency to break into smaller pieces                       |                                             |
| Wetness           | Capability of being melted in the mouth                     |                                             |
